# Supplementary material for: Allostatic Load Measurement: A Systematic Review of Reviews, Database Inventory, and Considerations for Neighborhood Research
Source: MDPI journal article supplement (doi:10.3390/ijerph192417006), 2022-12-18
Supplement: s1 [file s1]

## Review

# Allostatic Load Measurement: A Systematic Review of Reviews, Database Inventory, and Considerations for Neighborhood Research

Shawna Beese, Julie Postma and Janessa M. Graves

**Supplemental Materials Table S1.** Allostatic Load Calculation Methods extracted from 18 synthesis reviews identified through a systematic literature search for “allostatic load” conducted on 6 July 2021.

| Reference                   | Was Allostatic Load Calculation Method Addressed? | Summary of Allostatic Load Calculation Methods Used                                                                                                                    |
|-----------------------------|---------------------------------------------------|------------------------------------------------------------------------------------------------------------------------------------------------------------------------|
| Szanton et al., 2005[34]    | Yes                                               | Most common method, allostatic load dichotomized biomarkers based on quartiles and then summed                                                                         |
| Dowd et al., 2009[44]       | No                                                | Not addressed                                                                                                                                                          |
| Juster et al., 2010[49]     | Yes                                               | Most common method, allostatic load dichotomized biomarkers based on quartiles and then summed                                                                         |
| Beckie, 2012[90]            | Yes                                               | Allostatic load dichotomized biomarkers based on clinical ranges or quartiles                                                                                          |
| Mauss et al., 2015[111]     | Yes                                               | A discussion regarding the strengths and limitations of the varied methods of allostatic load calculations                                                             |
| Duong et al., 2017[18]      | Yes                                               | Variations include a) sum of biomarker z-scores, b) sum of dichotomized biomarkers based on quartiles, and c) sum of dichotomized biomarkers based on clinical cutoffs |
| Johnson et al., 2017[19]    | Yes                                               | Allostatic load dichotomized biomarkers based on quartiles                                                                                                             |
| Rosemberg et al., 2017[142] | Yes                                               | Most common method, allostatic load dichotomized biomarkers based on quartiles and then summed                                                                         |
| Wiley et al., 2017[32]      | Yes                                               | Most common method, allostatic load dichotomized biomarkers based on quartiles and then summed                                                                         |
| Ribeiro et al., 2018[11]    | Yes                                               | Variations include a) sum of biomarker z-scores, b) sum of dichotomized biomarkers based on quartiles, and c) sum of dichotomized biomarkers based on clinical cutoffs |

|                                             |     |                                                                                                                                                                        |
|---------------------------------------------|-----|------------------------------------------------------------------------------------------------------------------------------------------------------------------------|
| Larrabee<br>Sonderland et<br>al., 2019[165] | No  | Not addressed                                                                                                                                                          |
| D'Amico et al.,<br>2020[33]                 | Yes | Variations include a) sum of biomarker z-scores, b) sum of dichotomized biomarkers based on quartiles, and c) sum of dichotomized biomarkers based on clinical cutoffs |
| Ketheesan et<br>al., 2020[183]              | Yes | Allostatic load dichotomized biomarkers based on clinical ranges or quartiles                                                                                          |
| Kerr et al.,<br>2020[190]                   | No  | Not addressed                                                                                                                                                          |
| Misiak,<br>2020[228]                        | No  | Not addressed                                                                                                                                                          |
| Suvarna et al.,<br>2020[236]                | No  | Not addressed                                                                                                                                                          |
| Mathew et al.,<br>2021[251]                 | Yes | Variations include a) sum of biomarker z-scores, b) sum of dichotomized biomarkers based on quartiles, and c) sum of dichotomized biomarkers based on clinical cutoffs |
| Whelan et al.,<br>2021[260]                 | Yes | Biomarker summary scores with higher values indicating greater physiological strain.                                                                                   |

**Supplemental Materials Table S2.** Database inventory extracted from 18 synthesis reviews identified through a systematic literature search for “allostatic load” conducted on 6 July 2021.

| Database Name                                             | Website                                                                                           | Biomarkers Available                                                                                                  |
|-----------------------------------------------------------|---------------------------------------------------------------------------------------------------|-----------------------------------------------------------------------------------------------------------------------|
| <b>Databases with Georeferenced Biomarker Data</b>        |                                                                                                   |                                                                                                                       |
| National Health and Nutrition Examination Survey (NHANES) | <a href="https://www.cdc.gov/nchs/nhanes/index.htm">https://www.cdc.gov/nchs/nhanes/index.htm</a> | A1C, albumin, BMI, CRP, creatinine, DBP, fasting glucose, HR, PR, SBP, TC, TG, and WHR                                |
| Health and Retirement Study (HRS)                         | <a href="https://hrs.isr.umich.edu/about">https://hrs.isr.umich.edu/about</a>                     | A1C, CRP, Cystatin-C, DBP, HDL, HR, SBP, TC, and WC                                                                   |
| <b>Public Databases</b>                                   |                                                                                                   |                                                                                                                       |
| All of Us Research Hub (discovered outside of the review) | <a href="https://www.researchallofus.org/">https://www.researchallofus.org/</a>                   | A1C, albumin, BMI, cortisol, CRP, creatinine, DBP, DHEA, Epinephrine (n <1000), HDL, Heart Rate, LDL, SBP, TC, and TG |
| Multi-Ethnic Study of Atherosclerosis (MESA)              | <a href="https://www.mesa-nhlbi.org/">https://www.mesa-nhlbi.org/</a>                             | Glucose, HR, HWR, LDL, PP, SBP, and TG                                                                                |

|                                                        |                                                                                                                             |                                                                                                                  |
|--------------------------------------------------------|-----------------------------------------------------------------------------------------------------------------------------|------------------------------------------------------------------------------------------------------------------|
| Community Child Health Research Network (CCHN)         | <a href="https://dash.nichd.nih.gov/study/1649">https://dash.nichd.nih.gov/study/1649</a>                                   | A1C, BMI, cortisol, CRP, DBP, HDL, LDL, SBP, and WHR                                                             |
| <b>Other Databases Cited in Review</b>                 |                                                                                                                             |                                                                                                                  |
| MIDUS: Midlife in the United States                    | <a href="https://www.icpsr.umich.edu/web/pages/NACDA/midus.html">https://www.icpsr.umich.edu/web/pages/NACDA/midus.html</a> | A1C, DBP, TC, cortisol, CRP, DHEA, epinephrine, e-selectin, fibrinogen, HRV, ICAM, IL-6, norepinephrine, and SBP |
| Jackson Heart Study                                    | <a href="https://www.jacksonheartstudy.org/">https://www.jacksonheartstudy.org/</a>                                         | A1C, albumin, BMI, CRP, creatinine, DBP, E-selectin, fasting glucose, HDL, HOMA-IR, WHR, HR, LDL, TC, and TG     |
| National Archive of Computerized Data on Aging (NACDA) | <a href="https://www.icpsr.umich.edu/web/pages/NACDA/">https://www.icpsr.umich.edu/web/pages/NACDA/</a>                     | Albumin, creatinine clearance, CRP, DBP, HDL, IL-6, SBP, TC, TC: HDL, and WHR                                    |

*Note:* A1C = glycosylated hemoglobin, BMI = body mass index, CRP = C-reactive protein, DBP = diastolic blood pressure, DHEA = dehydroepiandrosterone, HDL = high-density lipoprotein, HOMA-IR = homeostatic model assessment for insulin resistance, HR=heart rate, HRV= heart rate variability, ICAM=intracellular adhesion molecule, IL-6= interleukin 6, LDL= low-density lipoprotein, PP= pulse pressure, SBP=systolic blood pressure, TC= total cholesterol, TC:HDL= high-density lipoprotein to total cholesterol density, TG= triglycerides, WHR = waist to hip ratio, and WC= waist circumference. The darker shaded biomarkers are the original 10, BMI, and CRP.
